# Supplementary material for: High amplification of FGFR1 gene is a delayed poor prognostic factor in early stage ESCC patients
Source: PubMed Central journal article supplement (PMC5650361; doi:10.18632/oncotarget.20215), 2017-08-12
Supplement: oncotarget-08-74539-s001.pdf [file oncotarget-08-74539-s001.pdf]

## **High amplification of FGFR1 gene is a delayed poor prognostic factor in early stage ESCC patients**

### **SUPPLEMENTARY MATERIALS**

**Supplementary Table 1: Association between clinicopathological characteristics and DFS/OS by COX regression model analysis in this cohort of 506 ESCC patients.**

**See Supplementary File 1**

**Supplementary Table 2: Association between clinicopathological characteristics and DFS/OS by COX regression model analysis in ESCC patients with stage III and IV disease.**

**See Supplementary File 2**

**Supplementary Table 3: Kaplan–Meier analysis for DFS and OS (divided patients by a series of DFS times)**

**See Supplementary File 3**

**Supplementary Table 4: Association between clinicopathological characteristics and DFS/OS by COX regression model analysis in ESCC patients with DFS time less than 30 months.**

**See Supplementary File 4**
